# Supplementary material for: A surface graft polymerization process on chemically stable medical ePTFE for suppressing platelet adhesion and activation
Source: Royal Society of Chemistry journal article supplement (doi:10.1039/c8bm00364e), 2018-01-01
Supplement: c8bm00364e1.pdf [file c8bm00364e1.pdf]

## Supplementary material

### **Surface graft polymerization process on chemically stable medical ePTFE for suppressing platelet adhesion and activation**

Yihua Liu,<sup>a</sup> Maria Chiara Munisso,<sup>a</sup> Atsushi Mahara,<sup>a</sup> Yusuke Kambe,<sup>a</sup> Kyoko  
Fukazawa,<sup>b</sup> Kazuhiko Ishihara,<sup>a</sup> and Tetsuji Yamaoka<sup>\*a</sup>

<sup>a</sup> Department of Biomedical Engineering, National Cerebral and Cardiovascular Center,  
5-7-1 Fujishirodai, Suita, Osaka 565-8565, Japan

<sup>b</sup> Department of Materials Engineering, Graduate School of Engineering, The University  
of Tokyo, 7-3-1 Hongo, Bunkyo-ku, Tokyo 113-8656, Japan

Corresponding Author

\* E-mail: yamtet@ncvc.go.jp. Tel.: +81-6-6833-5012 (ext.2637). Fax: +81-6-6835-5476.  
Tetsuji Yamaoka

- Experiment of Fig.S1: Surface modification method was introduced in section 2.2. The surface wettability was measured according to section 2.3 for 0 day at room temperature. The AFM image for topography of ePTFE after 1 min Ar plasma treatment was measured according to section 2.4.

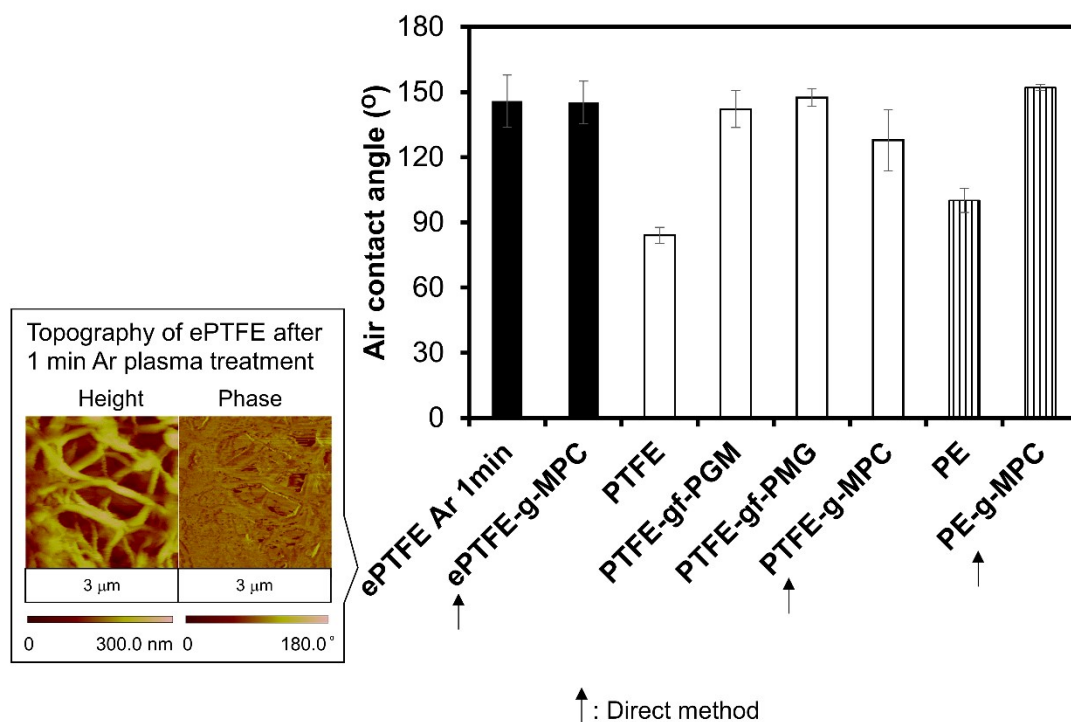

Fig. S1 Surface wettability of ePTFE, PTFE and PE with different grafting methods using a captive air bubble method of static contact angle measurement. AFM image for topography of ePTFE after 1 min Ar plasma treatment.

- Experiment of Fig.S2-S4 was introduced in section 2.5.

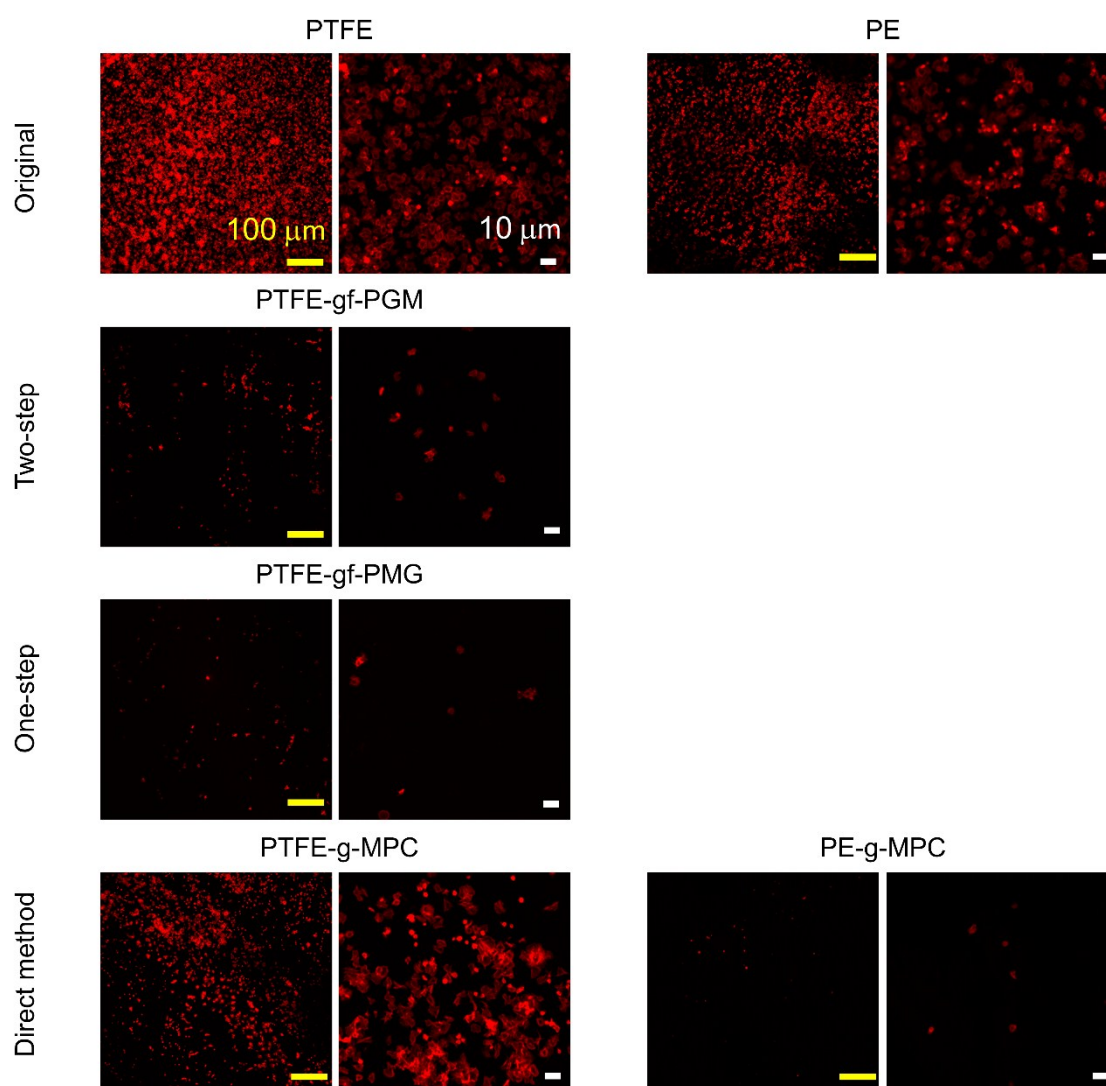

Fig. S2 In vitro platelet adhesion test for 1 h. PTFE and PE films were modified by MPC polymers with GMA linker (two-step and one-step), and without GMA linker (direct) methods. The adherent platelets were observed by CLSM (Red, rhodamine phalloidin).

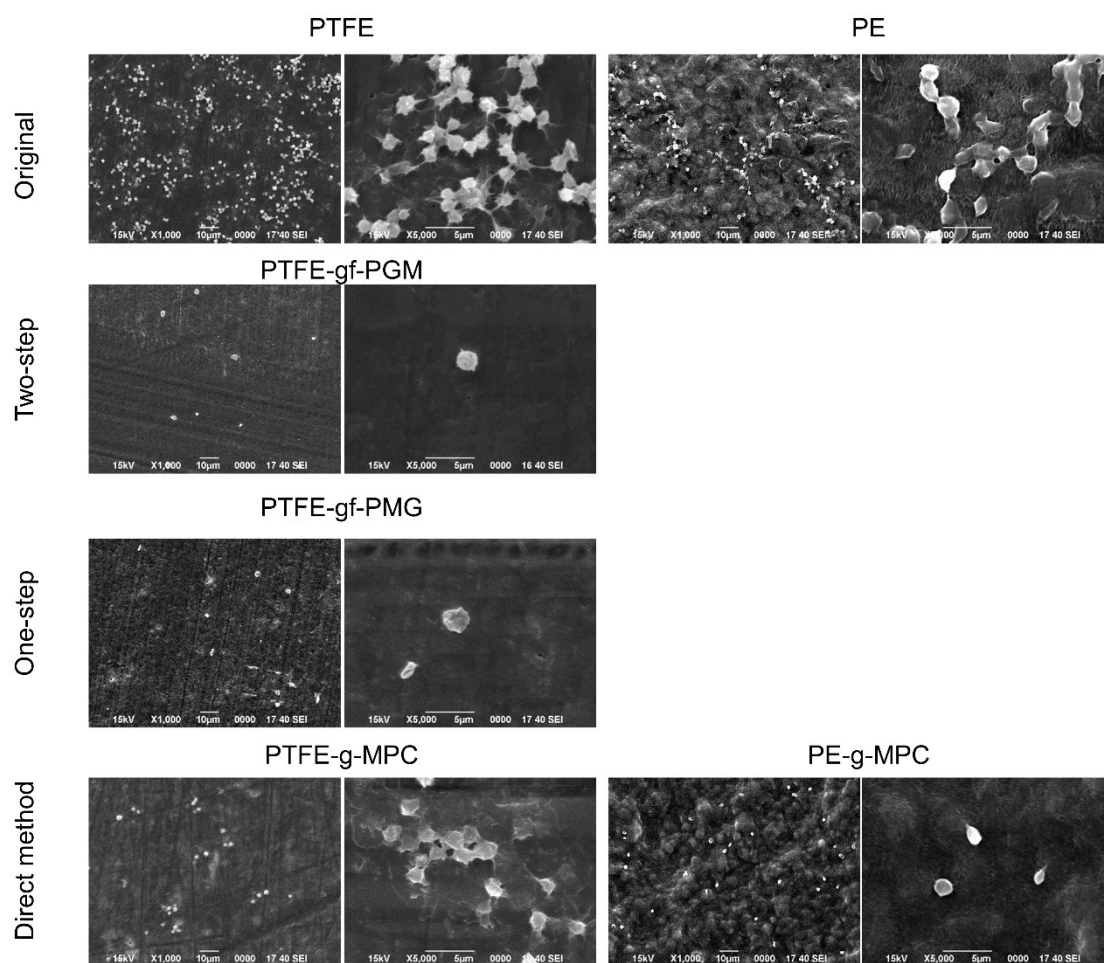

Fig. S3 In vitro platelet adhesion test for 1 h. PTFE and PE films were modified by MPC polymers with GMA linker (two-step and one-step), and without GMA linker (direct) methods. The adherent platelets were observed by SEM.

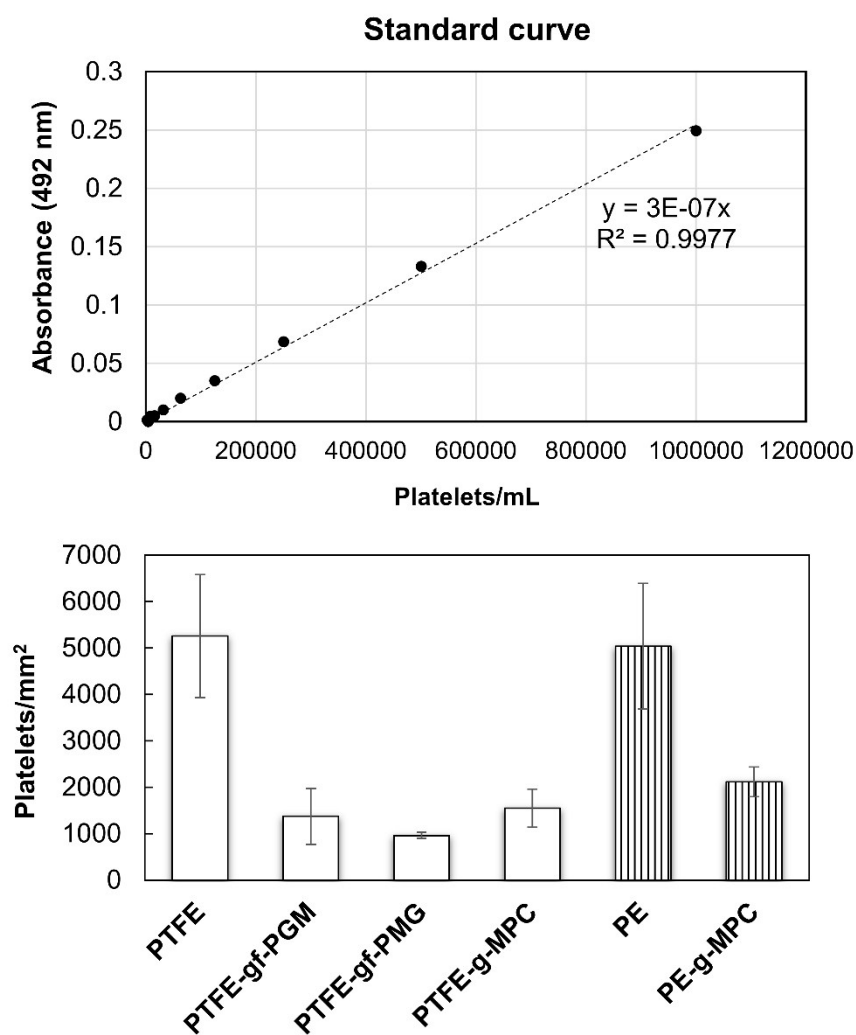

Fig. S4 In vitro platelet adhesion test for 1 h. Standard curve for LDH assay (top). The density of adherent platelets on substrates was analyzed by LDH assay (bottom).

- Experiment of Fig.S5-S6 was introduced in section 2.6.

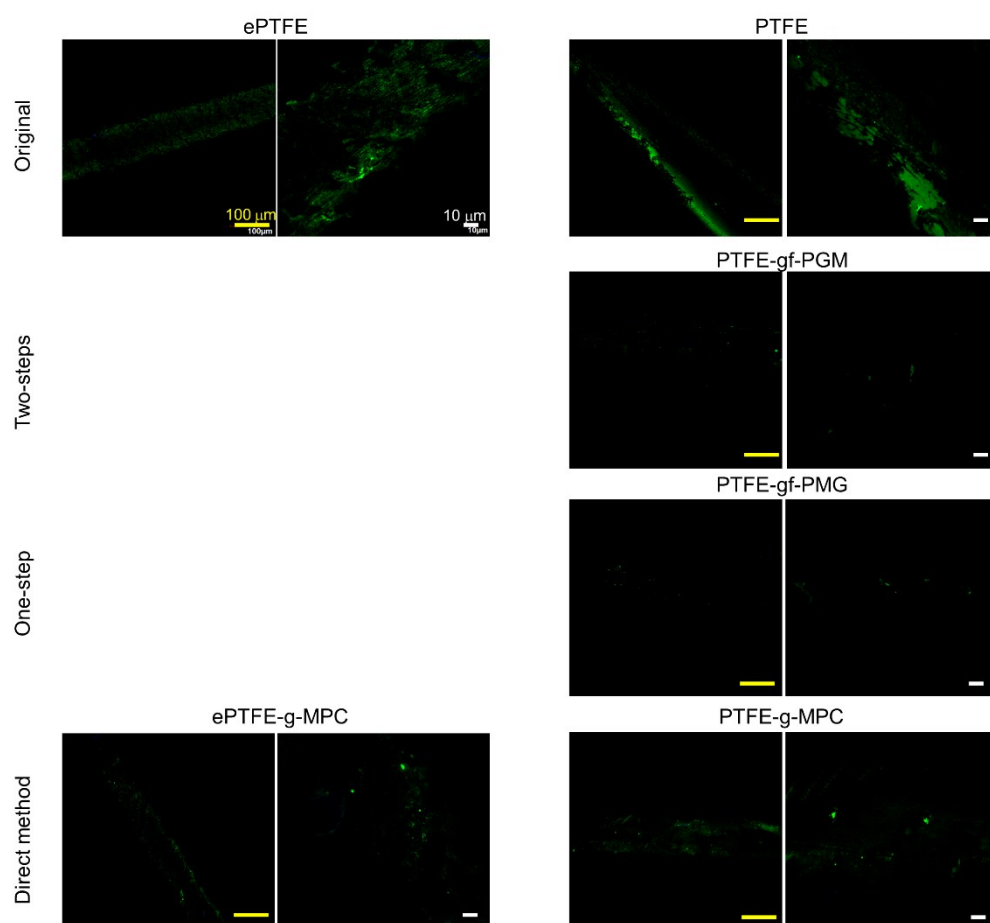

Fig. S5 Porcine blood contact test for 2 h in situ. CLSM fluorescence imaging of platelet adhesion and aggregation (green, CD41 antibody (FITC)) on ePTFE and PTFE sutures.

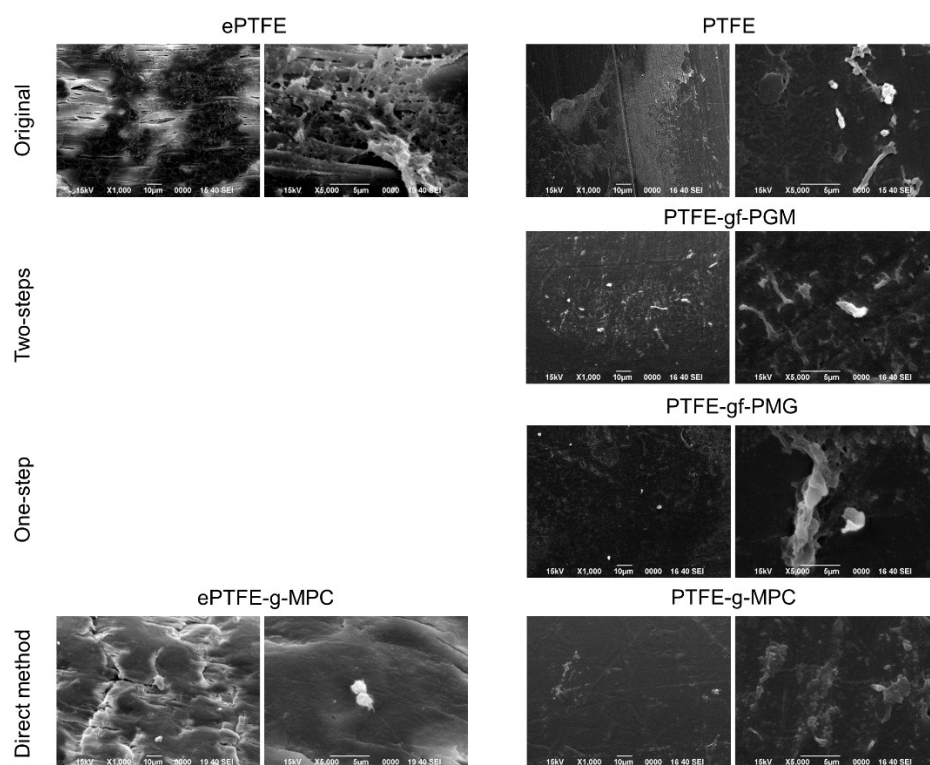

Fig. S6 Porcine blood contact test for 2 h in situ. SEM imaging of blood contacted surfaces on ePTFE and PTFE sutures.
